# Supplementary material
Source: bioRxiv or medRxiv preprint supplement (https://medrxiv.org/highwire/filestream/78681/field_highwire_adjunct_files/0/2020.04.30.20074765-1.pdf)
Supplement: Supplementary file [file 2020.04.30.20074765-1.pdf]

## Supplementary Information

Yasin Panahi, Fahimeh Salasar Moghaddam, Khadijeh Babaei, Mohammad Eftekhar, Reza Shervin Badv, Mohammad Reza Eskandari, Mohammad Vafae-Shahi, Hamid Pezeshk, and Mehrdad Pedram\*

### Sexual Dimorphism in Telomere Length in Childhood Autism

\*Corresponding Author: Mehrdad Pedram, Ph.D.

Dept. of Genetics and Molecular Medicine, School of Medicine, Zanjan University of Medical Sciences, Mahdavi Blvd., Shahrak Karmandan, Zanjan 45139-56111, IRAN.

Tel/Fax: +98 (24) 3344 9553.

E-mail: [mehrdad.pedram@gmail.com](mailto:mehrdad.pedram@gmail.com) or [mpedram@zums.ac.ir](mailto:mpedram@zums.ac.ir).

#### Contents of this supplement:

- **Legends to Supplementary Figures**
- **Table S1:** Demographics of individual male and female subjects in the study.
- **Table S2:** The ADI-R scores and verbal status of the autistic children in the study.
- **Figure S1:** Scatter plots of average relative telomere lengths (T/S ratios).
- **Figure S2:** Correlation between ADI-R total scores and RTL values among autistic subjects.
- **Table S3:** Comparison of the relative telomeric length values in two recent studies of autism with the present study.
- **Supplement Text S1:** Differences in the RTL values among similar groups from three different studies.
- **Corresponding References** (indicated in the Figure Legend and Text in brackets)

#### Legends to Supplementary Figures:

**Supplementary Figure S1: Scatter plots of average relative telomere lengths (T/S ratios).** The scatter plots of individual average relative telomere lengths (T/S ratios) for autistic children, their siblings, and healthy controls are presented in different combinations: **(A)** Irrespective of gender (*i.e.*, combined sexes); **(B)** Male subjects only; **(C)** Female subjects only; and **(D)** Male vs. female autistic children for emphasis.

**Supplementary Figure S2: Correlation between ADI-R total scores and RTL values among autistic subjects.** Correlation between T/S ratios (RTL) and ADI-R scores for: **(A)** autistic children irrespective of gender (squares); **(B)** autistic male children (triangles); **(C)** autistic female children (circles); and **(D)** verbal and **(E)** nonverbal autistic children (closed and open symbols, respectively). Spearman's rho ( $r_s$ ) correlation coefficient- and *P*-values are indicated at the bottom left side each graph area.

**Table S1:** Demographics of individual male (n= 36) and female (n= 22) subjects in the study.

| <b>Sample Group</b> | <b>Age (mo)</b> | <b>Maternal Age (yr)</b> | <b>Paternal Age (yr)</b> | <b>Birth Weight (kg)</b> | <b>City of Origin</b> |
|---------------------|-----------------|--------------------------|--------------------------|--------------------------|-----------------------|
| ...                 | ...             | ...                      | ...                      | ...                      |                       |
| ...                 | ...             | ...                      | ...                      | ...                      | ...                   |
| ...                 | ...             | ...                      | ...                      | ...                      |                       |

**Notes:** Individually matched sample groups are presented in separated rows with matched subscript numbers (first column) starting with the child/case with autism, his/her healthy sibling/s (if available), and a sex-, age- and location-matched healthy control child. Non-syndromic autism cases were collected from 10 different cities spanning nine provinces indicated by superscript numbers (...). Abbreviations: NC, not confirmed; mA, male child with autism; mS, male sibling; mC, male control; fA, female child with autism; fS, female sibling; f<sub>m</sub>S, male sibling from a family with a female autistic child; fC, female control. The superscript letter "D" indicates that the subject had been treated with an antipsychotic drug at some point in the past.

\*\*\*

**Special Note:** The contents of Table S1 could not be presented here because it would go against the policy of medRxiv to keep the identities of patients and other research participants totally anonymous in the Reprint articles. However, Table S1 could be available upon special requests.

**Table S2:** The ADI-R scores and verbal status of the autistic children in the study.

| No. | Male/<br>Female | V/NV | ADI-R Domains |       |    |    | ADI-R<br>Total Score |
|-----|-----------------|------|---------------|-------|----|----|----------------------|
|     |                 |      | A             | B     | C  | D  |                      |
| 1   | M               | V    | 24            | 20/10 | 10 | 4  | 58/48                |
| 2   | M               | NV   | 12            | 12    | 12 | 4  | 40                   |
| 3   | M               | V    | 30            | 23/13 | 8  | 3  | 64/54                |
| 4   | M               | NV   | 28            | 12    | 8  | 5  | 53                   |
| 5   | M               | V    | 24            | 25/13 | 11 | 4  | 64/52                |
| 6   | M               | V    | 31            | 26/14 | 12 | 3  | 72/60                |
| 7   | M               | V    | 32            | 23/14 | 12 | 4  | 71/62                |
| 8   | M               | V    | 19            | 20/11 | 8  | 3  | 52/41                |
| 9   | M               | V    | 29            | 20/14 | 8  | 4  | 61/55                |
| 10  | M               | V    | 32            | 25/14 | 12 | 4  | 73/62                |
| 11  | M               | NV   | 21            | 9     | 9  | 3  | 42                   |
| 12  | M               | V    | NC            | NC    | NC | NC | NC                   |
| 13  | M               | NV   | 31            | 14    | 9  | 1  | 55                   |
| 14  | M               | NV   | 32            | 14    | 10 | 5  | 61                   |
| 15  | F               | NV   | 29            | 14    | 10 | 5  | 58                   |
| 16  | F               | V    | 32            | 24/14 | 12 | 3  | 71/61                |
| 17  | F               | NV   | 31            | 14    | 12 | 4  | 61                   |
| 18  | F               | NV   | 30            | 10    | 12 | 5  | 57                   |
| 19  | F               | NV   | 28            | 10    | 8  | 5  | 55                   |
| 20  | F               | V    | 31            | 22/12 | 12 | 5  | 70/60                |
| 21  | F               | NV   | 32            | 14    | 8  | 4  | 58                   |
| 22  | F               | V    | 28            | 26/14 | 12 | 3  | 69/57                |
| 23  | F               | V    | 31            | 26/14 | 10 | 5  | 72/60                |
| 24  | F               | NV   | 32            | 14    | 9  | 4  | 59                   |

**Notes:** The scores for the three main ADI-R behavioral domains, social interaction, social communication, and repetitive and stereotyped behaviors are shown under columns A, B, and C, respectively. The column labeled "D" indicates the score for the ADI-R complementary section for evidence of abnormal development at/before 36 months of age. The cut-off scores for ADI-R domains A, B, C, and section D are 10, 8/7 (verbal/non-verbal subjects), 3, and 1, respectively. For comparison of ADI-R scores between subjects with ability to speak (*i.e.*, verbal) and those without speech (*i.e.*, non-verbal), the adjusted scores for the communication domain and also the total are shown after a slash under the respective columns by subtracting the scores for the verbal communication sub-domains (B2 and B3). ADI-R scores for each subject were determined by comparing and matching two independent interviews, otherwise taken as not confirmed based on a single interview, despite clinical diagnosis of non-syndromic autism (no. 12). Abbreviations: F, female; M, male; NC, not confirmed; NV, Non-verbal subject; V, verbal subject.

Figure S1

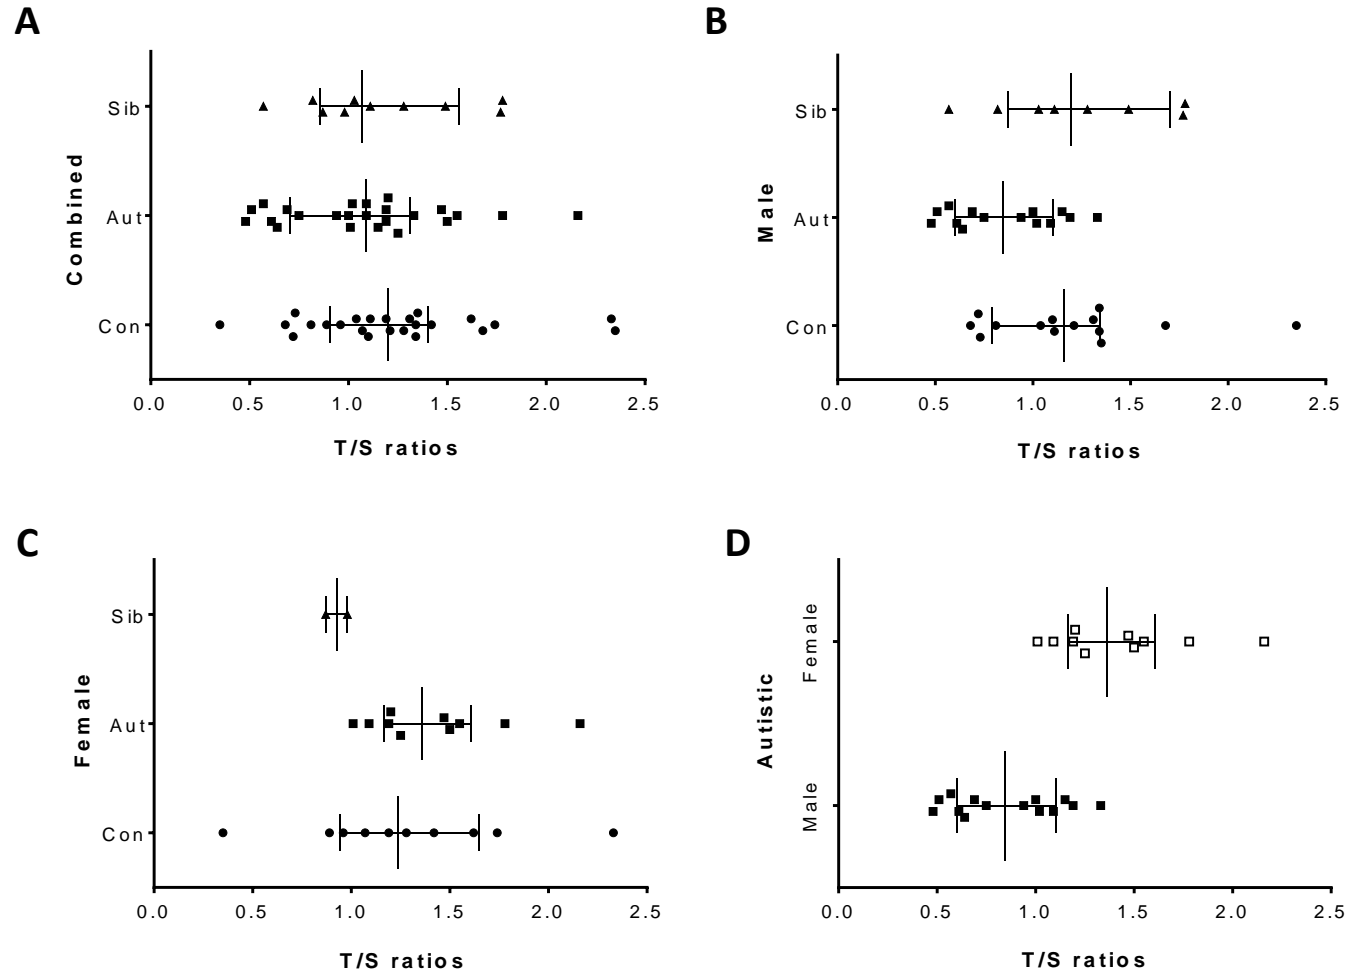

Figure S2

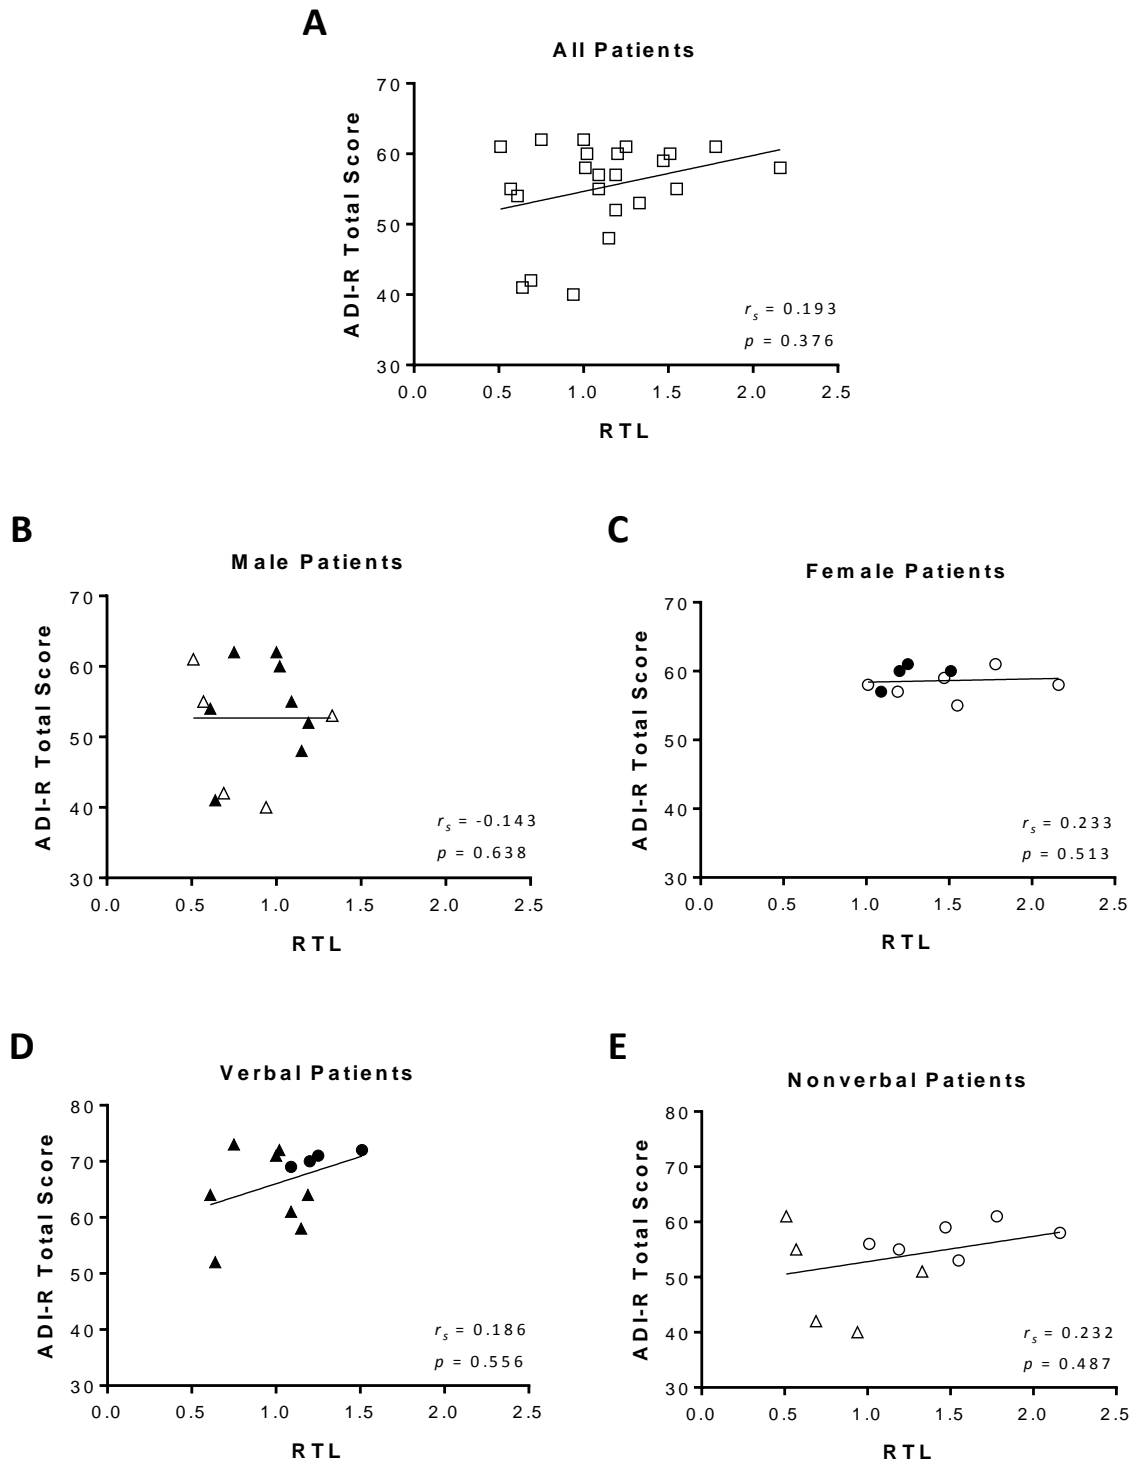

**Table S3:** Comparison of the relative telomeric length values in two recent studies of autism with the present study.

| Gender            | Li Z. <i>et al.</i> (2014) [1]<br>Blood<br>Singleplex qPCR |                       |         | Nelson CA. <i>et al.</i> (2015) [2]<br>Saliva <sup>a</sup><br>Singleplex qPCR |                                |                                | Present Study<br>Saliva<br>Monochrome Multiplex qPCR |                      |                      |
|-------------------|------------------------------------------------------------|-----------------------|---------|-------------------------------------------------------------------------------|--------------------------------|--------------------------------|------------------------------------------------------|----------------------|----------------------|
|                   | Autistic                                                   | Healthy Control       | Sibling | Autistic                                                                      | Healthy Control                | Sibling                        | Autistic                                             | Healthy Control      | Sibling              |
| Male<br>(no.)     | 0.86 ±0.25<br>(N=98)                                       | 0.99 ±0.44<br>(N=98)  | N/A     | 0.70 ±0.24<br>(N=16)                                                          | 0.76 ±0.46<br>(N=14)           | 0.73 ±0.46<br>(N=16)           | 0.85 ±0.28<br>(N=14)                                 | 1.19 ±0.44<br>(N=14) | 1.23 ±0.43<br>(N=8)  |
| Female<br>(no.)   | 1.01 ±0.44<br>(N=12)                                       | 1.06 ±0.38<br>(N=31)  | N/A     | 0.50 ±0.01<br>(N=2)                                                           | 0.79 ±0.47<br>(N=17)           | 0.87 ±0.15<br>(N=12)           | 1.42 ±0.35<br>(N=10)                                 | 1.28 ±0.53<br>(N=10) | 0.92 ±0.07<br>(N=2)  |
| Combined<br>(no.) | 0.88 ±0.28<br>(N=110)                                      | 1.01 ±0.43<br>(N=129) | N/A     | 0.66*<br>[0.52-0.79]<br>(N=18)                                                | 0.79*<br>[0.58-1.05]<br>(N=31) | 0.84*<br>[0.67-0.97]<br>(N=28) | 1.09 ±0.41<br>(N=24)                                 | 1.23 ±0.47<br>(N=24) | 1.17 ±0.40<br>(N=10) |

**Notes:** The cellular source for the extracted genomic DNA and the qPCR technique used is shown under each study. The RTL measurements for different clinical groups are mostly shown as the mean ±SD with the number of cases studied shown underneath each value in parentheses. The star signs in the study by Nelson *et al.* indicate median values with the interquartiles range shown underneath each number in brackets. There were no siblings included in the study by Li *et al.* All of the siblings in the study by Nelson *et al.* were younger than their respective autistic children. By contrast, while five out of 10 siblings in the present study were younger than their respective autistic cases, the other half were older. The mean ages (month ±SD) of the combined row (male plus female) for the clinical groups (in the order of autistic, control, and sibling) in each study were as follows: Li *et al.*, 57.98 ±24.94, 59.82 ±26.06, N/A; Nelson *et al.*, 87.00 ±34.50, 80.81 ±23.35, 26.17 ±16.12; Panahi *et al.*, 61.50 ±27.65, 65.25 ±28.58, 80.40 ±55.44.

**Special Notes:** The breakdown of male and female RTL values in the study by Nelson *et al.* were kindly provided by Dr. CA Nelson himself through personal communication. However, the lab declined our request for providing the age of the two female children with autism. <sup>a</sup> Although in the Method section, the authors indicate that “5 ng of buffy coat-derived genomic DNA” per reaction was used for their qPCR telomere assay (see the 2<sup>nd</sup> paragraph under the subtitle Telomere Length on p. 589 [2]), this is likely a typographical error as the authors emphasize using saliva samples earlier in the text.

## Supplement Text S1:

### *Inter-Study Relative Telomere Length Comparisons*

In reviewing the information presented in Table S3, it is interesting to note the considerable difference in the RTL values among similar groups from the three studies, particularly the contrast between the study by Nelson and colleagues and ours despite using the same non-invasive biofluid source (*i.e.*, saliva) for extraction of genomic DNA. As evident in the Materials and Methods and explained in the Discussion section, these variations in the RTL values between the three studies could be attributed to in part to the differences in the study designs and scope of the subjects. As mentioned in the notes under Table S3, it should be also noted here that the average age of the children with autism in the study by Nelson *et al.* is considerably older (>2 years) than the study by Li and colleagues and ours. Another potential complication in the study by Nelson *et al.* is that the average age of the cases with autism is about six months older than the healthy control group. This is in contrast to the present study and the work by Li *et al.*, in which the average age for the autism group is a few months less than that for the control group (see the notes under Table S3). Finally, part of the difference in the T/S ratios among the three studies is likely rooted in the different PCR techniques used to measure the RTLs. In the singleplex PCR method used by both Li *et al.* and Nelson *et al.*, the amplification of the telomere fragments and internal single-copy gene are done in separate reactions/tubes. By a sharp contrast, the MMQPCR method employed in our study provides a more accurate measurement of the T/S ratios because both the telomere and internal gene amplifications are carried out in a single reaction mix/tube [3].

## References:

1. Li Z, Tang J, Li H, Chen S, He Y, Liao Y *et al.* Shorter telomere length in peripheral blood leukocytes is associated with childhood autism. *Sci Rep* 2014; **4**: 7073.
2. Nelson CA, Varcin KJ, Coman NK, De Vivo I, Tager-Flusberg H. Shortened Telomeres in Families With a Propensity to Autism. *J Am Acad Child Adolesc Psychiatry* 2015; **54**(7): 588-594.
3. Cawthon RM. Telomere length measurement by a novel monochrome multiplex quantitative PCR method. *Nucleic Acids Res* 2009; **37**(3): e21.
